# Supplementary material
Source: PubMed Central journal article supplement (PMC5785314)
Supplement: HESR-53-15-s002.pdf [file HESR-53-15-s002.pdf]

# The volume-outcome relationship revisited: Practice indeed makes perfect

(Corinna Hentschker and Roman Mennicken)

## Appendix

Figure A1: Inclusion and exclusion criteria for hip fracture patients

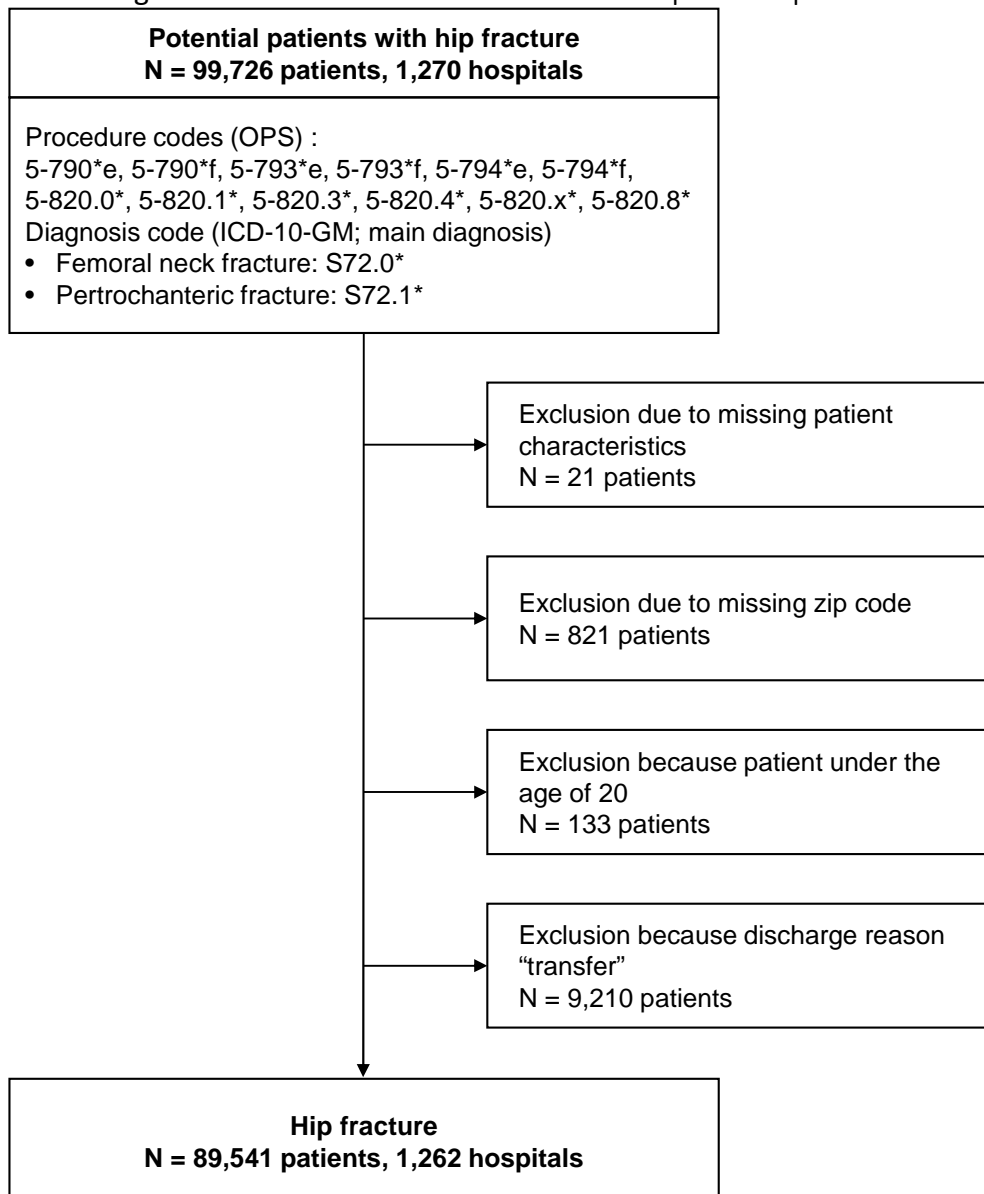

Note: \* - stands for all possible subcategories

Table A1: Descriptive statistics for hip fracture patients – Elixhauser comorbidities

|                                                 | <b>Mean</b> | <b>S.D.</b> | <b>Min</b> | <b>Max</b> |
|-------------------------------------------------|-------------|-------------|------------|------------|
| Congestive heart failure                        | 0.216       | 0.411       | 0          | 1          |
| Cardiac arrhythmias                             | 0.186       | 0.389       | 0          | 1          |
| Valvular disease                                | 0.043       | 0.204       | 0          | 1          |
| Pulmonary circulation disorders                 | 0.018       | 0.132       | 0          | 1          |
| Peripheral vascular disease                     | 0.047       | 0.212       | 0          | 1          |
| Hypertension, uncomplicated                     | 0.451       | 0.498       | 0          | 1          |
| Hypertension, complicated                       | 0.071       | 0.256       | 0          | 1          |
| Paralysis                                       | 0.043       | 0.203       | 0          | 1          |
| Other neurological disorders                    | 0.086       | 0.281       | 0          | 1          |
| Chronic pulmonary disease                       | 0.083       | 0.276       | 0          | 1          |
| Diabetes, uncomplicated                         | 0.152       | 0.359       | 0          | 1          |
| Diabetes, complicated                           | 0.049       | 0.215       | 0          | 1          |
| Hypothyroidism                                  | 0.053       | 0.224       | 0          | 1          |
| Renal failure                                   | 0.128       | 0.334       | 0          | 1          |
| Liver disease                                   | 0.017       | 0.131       | 0          | 1          |
| Peptic ulcer disease excluding bleeding         | 0.003       | 0.054       | 0          | 1          |
| Lymphoma                                        | 0.003       | 0.055       | 0          | 1          |
| Metastatic cancer                               | 0.009       | 0.094       | 0          | 1          |
| Solid tumor without metastasis                  | 0.020       | 0.140       | 0          | 1          |
| Rheumatoid arthritis/collagen vascular diseases | 0.014       | 0.119       | 0          | 1          |
| Coagulopathy                                    | 0.034       | 0.180       | 0          | 1          |
| Obesity                                         | 0.054       | 0.225       | 0          | 1          |
| Weight loss                                     | 0.025       | 0.158       | 0          | 1          |
| Fluid and electrolyte disorder                  | 0.225       | 0.418       | 0          | 1          |
| Blood loss anemia                               | 0.015       | 0.123       | 0          | 1          |
| Deficiency anemia                               | 0.016       | 0.127       | 0          | 1          |
| Alcohol abuse                                   | 0.036       | 0.185       | 0          | 1          |
| Drug abuse                                      | 0.015       | 0.122       | 0          | 1          |
| Psychoses                                       | 0.010       | 0.097       | 0          | 1          |
| Depression                                      | 0.055       | 0.227       | 0          | 1          |

Table A2: Marginal effects of Probit and IV-Probit estimates (full models)

|                                   | Probit<br>(5)          | IV-Probit<br>(10)      | IV-Probit<br>(15)      |
|-----------------------------------|------------------------|------------------------|------------------------|
| Ln case volume                    | -0.0123***<br>(0.0022) | -0.0334***<br>(0.0061) | -0.0259***<br>(0.0071) |
| Age                               | 0.0034***<br>(0.0001)  | 0.0035***<br>(0.0001)  | 0.0034***<br>(0.0001)  |
| Male                              | 0.0295***<br>(0.0019)  | 0.0300***<br>(0.0019)  | 0.0297***<br>(0.0019)  |
| Admission reason: emergency       | -0.0008<br>(0.0020)    | -0.0003<br>(0.0020)    | -0.0006<br>(0.0020)    |
| transfer                          | 0.0244***<br>(0.0075)  | 0.0218***<br>(0.0074)  | 0.0226***<br>(0.0074)  |
| Femoral neck fracture             | 0.0009<br>(0.0015)     | 0.0001<br>(0.0015)     | 0.0004<br>(0.0015)     |
| Winter                            | 0.0043***<br>(0.0016)  | 0.0041***<br>(0.0016)  | 0.0042***<br>(0.0016)  |
| Weekend                           | 0.0013<br>(0.0017)     | 0.0015<br>(0.0017)     | 0.0015<br>(0.0017)     |
| Ownership: private not-for-profit | 0.0015<br>(0.0022)     | -0.0017<br>(0.0024)    | -0.0005<br>(0.0025)    |
| private for-profit                | 0.0011<br>(0.0031)     | -0.0014<br>(0.0035)    | -0.0005<br>(0.0034)    |
| University hospital               | 0.0031<br>(0.0070)     | 0.0000<br>(0.0069)     | 0.0012<br>(0.0069)     |
| Teaching hospital                 | 0.0029<br>(0.0025)     | 0.0077***<br>(0.0029)  | 0.0059**<br>(0.0030)   |
| Beds: 201-499                     | 0.0084***<br>(0.0026)  | 0.0165***<br>(0.0033)  | 0.0136***<br>(0.0035)  |
| ≥ 500                             | 0.0094**<br>(0.0037)   | 0.0235***<br>(0.0052)  | 0.0186***<br>(0.0057)  |
| ICU                               | -0.0053**<br>(0.0021)  | -0.0031<br>(0.0022)    | -0.0039*<br>(0.0022)   |
| Purchasing power per inhabitant   | -0.0004<br>(0.0003)    | -0.0001<br>(0.0003)    | -0.0002<br>(0.0003)    |
| Unemployment rate                 | 0.0010***<br>(0.0002)  | 0.0008***<br>(0.0003)  | 0.0009***<br>(0.0003)  |
| Elixhauser comorbidities          | Yes                    | Yes                    | Yes                    |
| Settlement structure indicators   | Yes                    | Yes                    | Yes                    |
| First-stage F-statistic           |                        | 42.3054                | 119.6255               |
| Test for endogeneity (p-value)    |                        | 0.0001                 | 0.0299                 |
| Overidentification test (p-value) |                        | 0.0999                 |                        |
| Observations                      | 89,541                 | 89,541                 | 89,541                 |
| Number of hospitals               | 1,262                  | 1,262                  | 1,262                  |

Notes: Clustered standard errors (at the hospital level) in parentheses;

\* p<0.10, \*\* p<0.05, \*\*\* p<0.01. IV-Probit (10) refers to the IV-probit regression with the instruments number of potential patients and further hospitals in the regional area. IV-Probit (15) refers to the IV-probit regression with the instrument number of potential patients per hospital in the regional area.

Table A3: First-stage regression explaining ln case volume

|                                                | IV-Probit<br>(10)      | IV-Probit<br>(15)      |
|------------------------------------------------|------------------------|------------------------|
| Potential patients within 0–10 min             | 0.0025***<br>(0.0003)  |                        |
| 10–20 min                                      | 0.0007***<br>(0.0001)  |                        |
| 20–30 min                                      | 0.0003***<br>(0.0001)  |                        |
| Further hospitals within 0–15 min              | -0.1011***<br>(0.0080) |                        |
| 15–30 min                                      | -0.0226***<br>(0.0040) |                        |
| Pot. patients per hospital between 0 to 15 min |                        | 0.0052***<br>(0.0005)  |
| Age                                            | 0.0008***<br>(0.0002)  | 0.0010***<br>(0.0002)  |
| Male                                           | 0.0050<br>(0.0037)     | 0.0067*<br>(0.0037)    |
| Admission reason: emergency                    | 0.0307**<br>(0.0136)   | 0.0256*<br>(0.0143)    |
| transfer                                       | -0.0839**<br>(0.0376)  | -0.0737**<br>(0.0318)  |
| Femoral neck fracture                          | -0.0296***<br>(0.0037) | -0.0335***<br>(0.0038) |
| Winter                                         | -0.0081**<br>(0.0034)  | -0.0076**<br>(0.0033)  |
| Weekend                                        | 0.0059*<br>(0.0032)    | 0.0070**<br>(0.0033)   |
| Ownership: private not-for-profit              | -0.1078***<br>(0.0276) | -0.1237***<br>(0.0279) |
| private for-profit                             | -0.1342***<br>(0.0407) | -0.0977**<br>(0.0422)  |
| University hospital                            | -0.0909<br>(0.0855)    | -0.1145<br>(0.0862)    |
| Teaching hospital                              | 0.1922***<br>(0.0301)  | 0.1831***<br>(0.0294)  |
| Beds: 201-499                                  | 0.4098***<br>(0.0356)  | 0.3587***<br>(0.0350)  |
| ≥ 500                                          | 0.6331***<br>(0.0511)  | 0.5875***<br>(0.0532)  |
| ICU                                            | 0.0301<br>(0.0296)     | 0.0633**<br>(0.0302)   |
| Purchasing power per inhabitant                | 0.0054**<br>(0.0025)   | 0.0093***<br>(0.0030)  |
| Unemployment rate                              | -0.0058**<br>(0.0023)  | -0.0056**<br>(0.0023)  |
| Constant                                       | 3.7252***<br>(0.0729)  | 3.4612***<br>(0.0779)  |
| Elixhauser comorbidities                       | Yes                    | Yes                    |
| Settlement structure indicators                | Yes                    | Yes                    |
| R <sup>2</sup>                                 | 0.511                  | 0.500                  |
| Observations                                   | 89,541                 | 89,541                 |
| Number of hospitals                            | 1,262                  | 1,262                  |

Notes: Clustered standard errors (at the hospital level) in parentheses; \* p<0.10, \*\* p<0.05, \*\*\* p<0.01.
